# Supplementary material for: Discovery of twin orbital-order phases in ferromagnetic semiconducting VI3 monolayer
Source: Royal Society of Chemistry journal article supplement (doi:10.1039/c9cp05643b), 2019-12-02
Supplement: c9cp05643b2.pdf [file c9cp05643b2.pdf]

Supporting Information for

**Discovery of Twin Orbital-order Phases in  
Ferromagnetic Semiconducting  $\text{VI}_3$  Monolayer**

Chengxi Huang<sup>ab</sup>, Fang Wu<sup>c</sup>, Shunli Yu<sup>\*d</sup>, Puru Jena<sup>\*a</sup>, Erjun Kan<sup>\*b</sup>

<sup>a</sup> Physics Department, Virginia Commonwealth University, Richmond, VA 23284

<sup>b</sup> Department of Applied Physics and Institution of Energy and Microstructure,  
Nanjing University of Science and Technology, Nanjing, Jiangsu 210094, P. R.  
China

<sup>c</sup> College of Information Science and Technology, Nanjing Forestry University,  
Nanjing, Jiangsu 210037, P. R. China

<sup>d</sup> National Laboratory of Solid State Microstructures and School of Physics, Nanjing  
University, Nanjing 210093, P.R. China

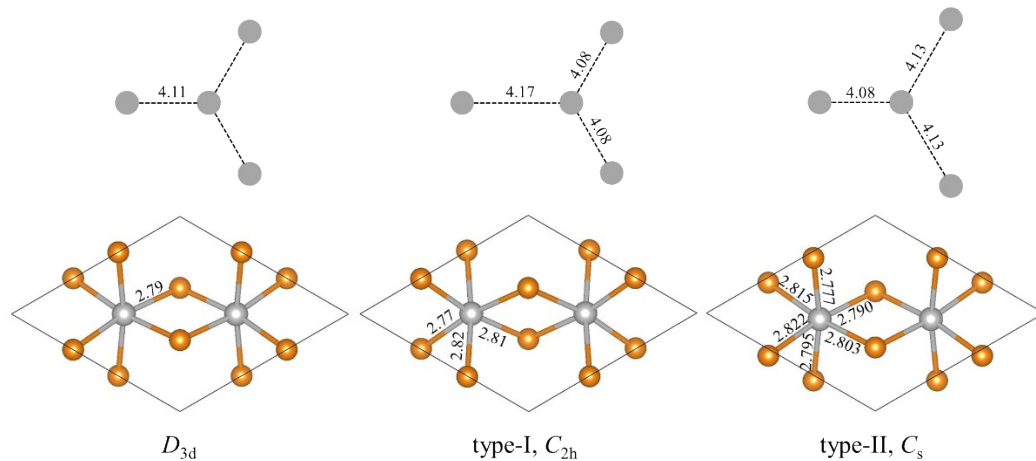

**Fig. S1.** The structural details for different structural phases of  $VI_3$  monolayer. The inset labels represent the corresponding V-V and V-I bond length (in angstrom).

Following is the POSCAR files (used for VASP) for type-I and type-II phases of  $VI_3$  monolayer.

Type-I

1.0

|               |              |               |
|---------------|--------------|---------------|
| 7.1517000198  | 0.0000000000 | 0.0000000000  |
| -3.5418534139 | 6.2130578275 | 0.0000000000  |
| 0.0000000000  | 0.0000000000 | 20.0000000000 |

I V  
6 2

Direct

|             |             |             |
|-------------|-------------|-------------|
| 0.360170017 | 0.996910016 | 0.581150007 |
| 0.003090001 | 0.639830000 | 0.418849993 |
| 0.639829955 | 0.003090000 | 0.418849993 |
| 0.996909944 | 0.360170027 | 0.581150007 |
| 0.630149945 | 0.630149981 | 0.581510019 |
| 0.369849998 | 0.369850008 | 0.418489981 |
| 0.330649969 | 0.669350036 | 0.500000000 |
| 0.669350028 | 0.330650029 | 0.500000000 |

Type-II

1.0

|               |              |               |
|---------------|--------------|---------------|
| 7.1603999138  | 0.0000000000 | 0.0000000000  |
| -3.5771691193 | 6.2028370942 | 0.0000000000  |
| 0.0000000000  | 0.0000000000 | 20.0000000000 |

I V  
6 2

Direct

|             |             |             |
|-------------|-------------|-------------|
| 0.965569899 | 0.598909978 | 0.418389988 |
|-------------|-------------|-------------|

|             |             |             |
|-------------|-------------|-------------|
| 0.338979976 | 0.972749980 | 0.581749964 |
| 0.598909960 | 0.965569945 | 0.418389988 |
| 0.972749997 | 0.338979970 | 0.581749964 |
| 0.324600008 | 0.324599988 | 0.419580030 |
| 0.611570025 | 0.611569979 | 0.580519962 |
| 0.305280010 | 0.634729975 | 0.500000000 |
| 0.634729980 | 0.305280004 | 0.500000000 |

**Table S1.** Parameters derived from the maximally localized Wannier functions (MLWFs) calculated by using the wannier90 package [1]. The exchange field ( $U = \varepsilon_{d\downarrow} - \varepsilon_{d\uparrow}$ ), crystal field ( $\Delta_c = \varepsilon_{eg\uparrow} - \varepsilon_{t2g\uparrow}$ ), energy difference between V- $d$  and I- $p$  levels ( $\Delta_{pd} = \varepsilon_{t2g\uparrow} - \varepsilon_{p\uparrow}$ ) and energy level split of  $t_{2g}$  levels [ $\Delta_{t2g} = (\varepsilon_{dxy\uparrow} - \varepsilon_{dxz,yz\uparrow})/3$ ] for different phases of  $\text{VI}_3$  monolayer.

|          | $U$ (eV) | $\Delta_c$ (eV) | $\Delta_{pd}$ (eV) | $\Delta_{t2g}$ (eV) |
|----------|----------|-----------------|--------------------|---------------------|
| $D_{3d}$ | 3.0      | 2.0             | 0.6                | 0                   |
| Type-I   | 2.8      | 1.6             | 0.5                | 0.47                |
| Type-II  | 2.8      | 1.6             | 0.5                | -0.37               |

**Table S2.** Relative energies (in eV) per unit cell for FM state of different phases of  $\text{VI}_3$  monolayer calculated by DFT+ $U$  method (with  $U_{\text{eff}} = 0 \sim 4$  eV) and HSE06 functional. When  $U_{\text{eff}} = 0$  eV, all the phases always automatically converge into  $D_{3d}$  phase. When  $U_{\text{eff}} = 1$  eV, the  $C_{3i}$  and  $C_2$  phase always automatically converge into type-I or type-II phases. When using HSE06 functional, the initial  $D_{3d}$  phase always automatically converge into type-I or type-II distorted phases.

Here we didn't use the energy difference between type-I and type-II phases calculated by HSE06 functional to determine the value of  $U_{\text{eff}}$ , because such energy difference is too small ( $\leq 0.75$  meV/atom) to be reliable. Nevertheless, these results confirm the existence of twin orbital order phases of  $\text{VI}_3$  monolayer. The reason we chose  $U_{\text{eff}} = 3$  eV to study the properties of  $\text{VI}_3$  monolayer is that the calculated electronic band gaps (0.86 and 0.88 eV) are very close to the experimental values (0.84~0.9 eV).

|                   | DFT + $U_{\text{eff}}$ (eV) |        |        |        |        | HSE06 |
|-------------------|-----------------------------|--------|--------|--------|--------|-------|
|                   | 0                           | 1      | 2      | 3      | 4      |       |
| $D_{3d}$          | 0                           | 0      | 0      | 0      | 0      | ---   |
| $C_{2h}$ (Type-I) | ---                         | -0.063 | -0.295 | -0.515 | -0.627 | 0.006 |
| $C_s$ (Type-II)   | ---                         | -0.068 | -0.295 | -0.513 | -0.621 | 0     |
| $C_{3i}$          | ---                         | ---    | -0.177 | -0.418 | -0.544 | ---   |
| $C_2$             | ---                         | ---    | -0.221 | -0.403 | -0.524 | ---   |

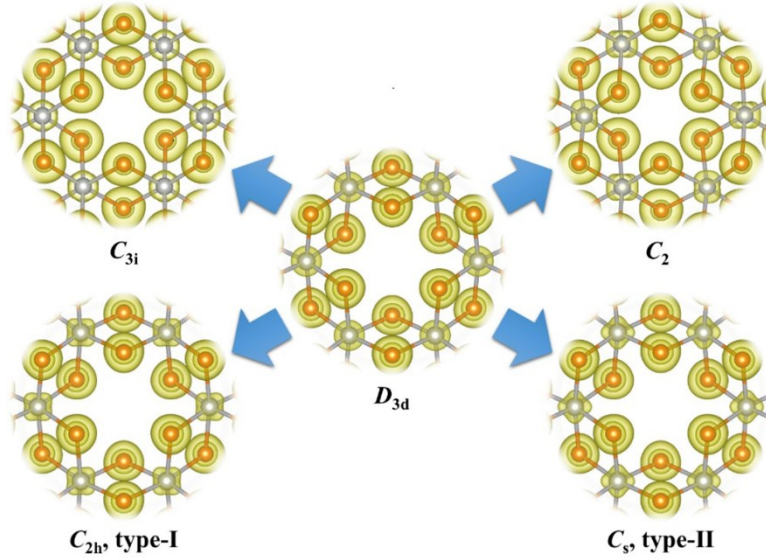

**Fig. S2.** Spatial charge density of  $\text{VI}_3$  monolayer with different crystal symmetry and orbital ordering. The  $D_{3d}$  phase is studied in previous theoretical work. The  $C_{3i}$  and  $C_2$  phases are the monolayers taken from recently experimentally observed  $R\bar{3}$  and  $C2/c$  bulk phases, respectively. The type-I and type-II phases are presented in this work.

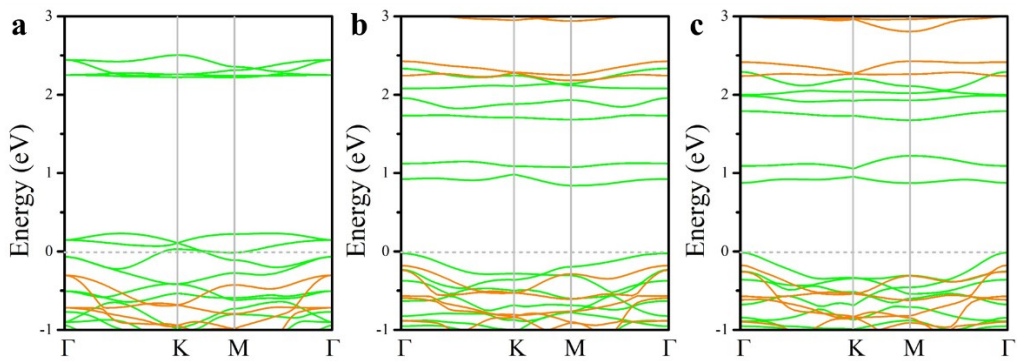

**Fig. S3.** Spin resolved band structures for (a)  $D_{3d}$  (b) type-I and (c) type-II phases of  $\text{VI}_3$  monolayer.

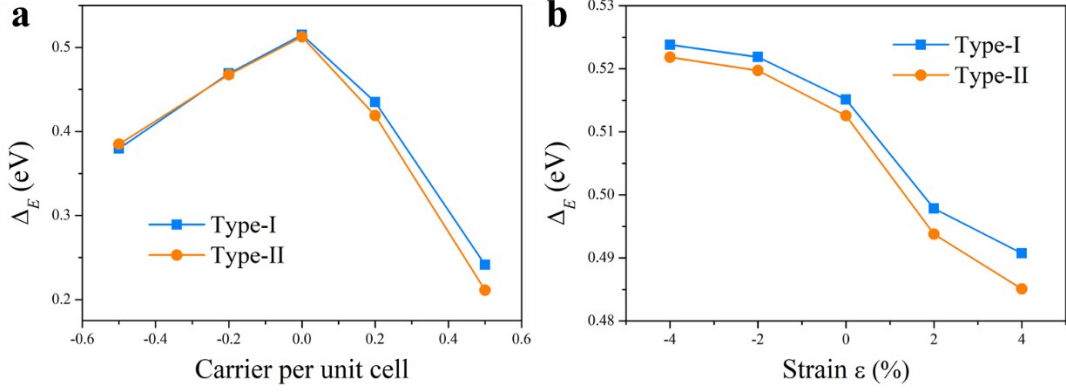

**Fig. S4.** Effect of (a) carrier doping and (b) in-plane external strain effect on  $\Delta E$  for twin orbital-order phases of  $\text{VI}_3$  monolayer. Negative and positive values of carrier concentration represent hole and electron doping, respectively.

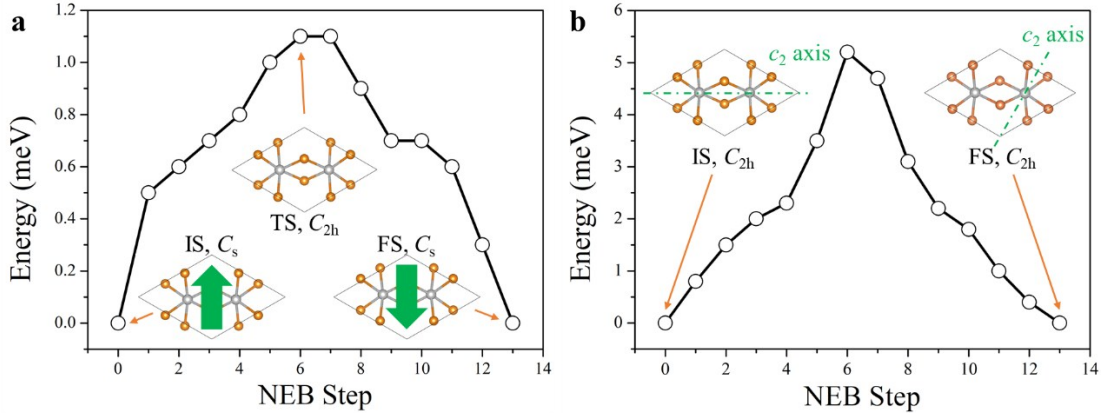

**Fig. S5.** (a) Ferroelectric switching along  $[-110]$  orientation for type-II  $\text{VI}_3$  monolayer simulated by nudged-elastic-band (NEB) method. Green arrows represent the electric dipole moment. The initial state (IS) and the final state (FS) are equivalent but have reversed ferroelectric order. The transition state (TS) has a  $C_{2h}$  structure. (b) The transition between  $0^\circ$  and  $120^\circ$  type-I phases. The IS and FS are equivalent but their in-plane  $c_2$  axis relatively rotates by  $120^\circ$ .

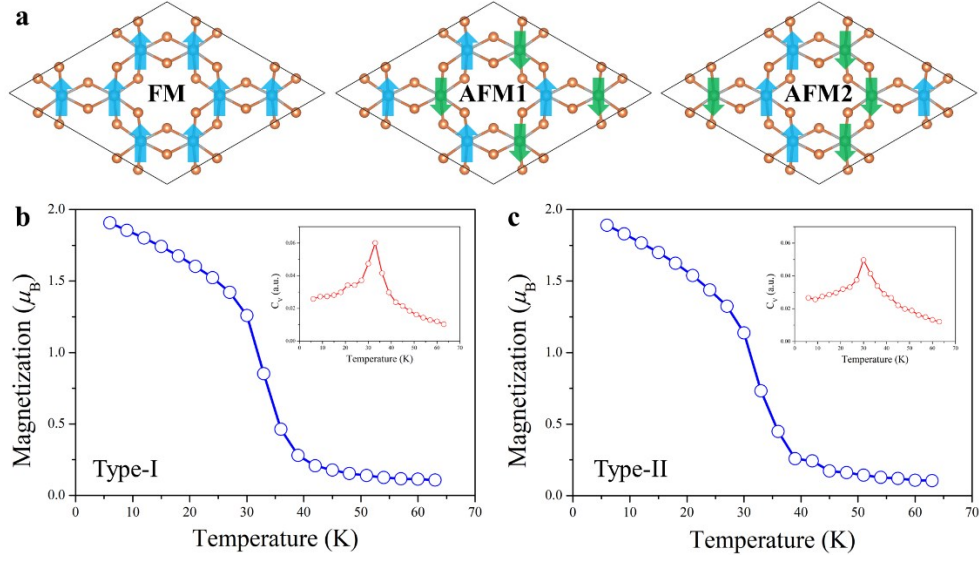

**Fig. S6.** (a) Considered spin configurations: The magnetizations along easy-axis direction and specific heat (Insets) as a function of temperature for (b) type-I and (b) type-II  $\text{VI}_3$  monolayers from Monte-Carlo (MC) simulations.

According to the spin Hamiltonian

$$\hat{H} = -\frac{1}{2} \sum_i (J_1 \vec{S}_i \cdot \vec{S}_{i,1} + 2J_2 \vec{S}_i \cdot \vec{S}_{i,2}) - D \sum_i \vec{S}_{i,e_z}^2$$

where the summation  $i$  runs over all the V sites,  $J_1$  (along  $[110]$  orientation) and  $J_2$  (along  $[-210]$  and  $[210]$  orientation) represent two different nearest-neighbor exchange parameters,  $D$  is the single-ion magnetic anisotropic parameter,  $S_{i,e_z}$  represents the component of  $S_i$  along the easy-axis direction and  $|\mathbf{S}| = 1$  for the  $d^2$  V ions. The relative energies per V for each spin configuration can be written as

$$E_{FM} = J_1 + 2J_2 + E_0$$

$$E_{AFM1} = -J_1 - 2J_2 + E_0$$

$$E_{AFM2} = -J_1 + 2J_2 + E_0$$

$D$  can be obtained by calculating the magnetic anisotropic energy including spin-orbit coupling (SOC) effects, namely,

$$E_{FM-easy} = J_1 + 2J_2 + D + E_0$$

$$E_{FM-hard} = J_1 + 2J_2 + E_0$$

The classical Metropolis MC simulations were performed based on the above spin Hamiltonian. This method has been well examined in our previous work [2].

A  $30 \times 30$  2D spin lattice containing 1800 spin sites with periodic boundary condition is used. During the simulation steps, each spin is rotated randomly in all directions. The average magnetization per site is taken after the system reaches equilibrium (with at least  $10^5$  simulation steps) state at a given temperature. The Curie temperature ( $T_C$ ) is taken as the critical point of the specific heat, defined as  $C_V = (\langle E^2 \rangle - \langle E \rangle^2) / k_B T^2$ . From Fig. S6b and c, we see that below  $T_C$ , the magnetizations are aligned along the easy-axis direction, indicating that the magnetic anisotropy is strong enough to form a long-range 2D FM order in the  $\text{VI}_3$  monolayer.

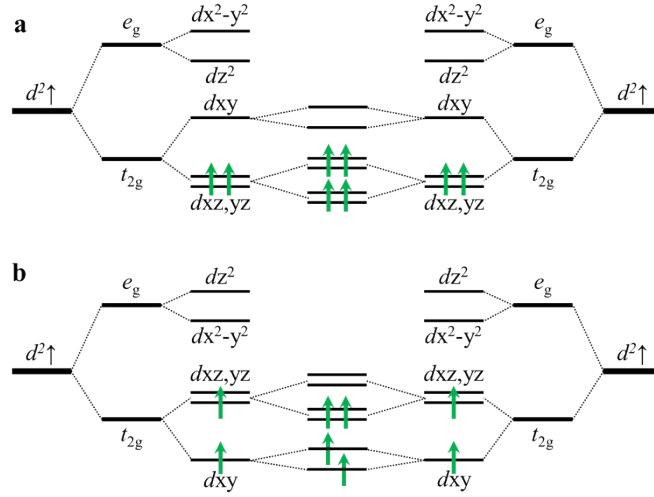

**Fig. S7.** Schematic diagram of orbital evolution for (a) type-I and (b) type-II phases.

## Section II: The tight binding cluster model

Since structural distortions in the  $\text{VI}_3$  monolayer are very small, and the V-I and V-V bond lengths and bond angles change only slightly. The structural distortion energy is very small ( $\sim 14$  meV) compared to the large stabilization energy ( $> 500$  meV). Thus, here we omitted the structural distortions and used high-symmetric ( $O_h$ )  $\text{V-I}_6$  octahedrons to construct the cluster model to describe the interactions between two neighboring octahedrally coordinated V ions. Based

on the mean field treatment and the linear combination of atomic orbitals method, the general Hamiltonian of the cluster is written as [4]

$$\begin{aligned} \hat{H} = & \sum_{i\alpha} \epsilon_{i\alpha} \hat{d}_{i\alpha}^\dagger \hat{d}_{i\alpha} + \sum_{k\gamma} \epsilon_{k\gamma} \hat{p}_{k\gamma}^\dagger \hat{p}_{k\gamma} + \sum_{i\alpha, k\gamma} [T_{i\alpha, k\gamma} \hat{d}_{i\alpha}^\dagger \hat{p}_{k\gamma} + h.c.] + \sum_{i\alpha, j\beta} [ \\ & + \frac{U}{2} \sum_i \vec{e}_i \cdot \vec{S}_i \end{aligned}$$

where  $\alpha$  ( $\beta$ ) represent  $d$  orbitals ( $d_{xy}, d_{yz}, d_{xz}, d_{x^2-y^2}, d_{z^2}$ ),  $\gamma$  represents  $p$  orbitals ( $p_x, p_y, p_z$ ),  $i$  ( $j$ ) represent site index of magnetic ions,  $k$  represents site of ligand ions, respectively. The first and second terms denote the on-site energy of  $d$  and  $p$  orbitals. The third term denotes the hopping between  $d$  and  $p$  orbitals. The fourth term denotes the hopping between  $d$  orbitals. The last term is the exchange field energy of magnetic ions in an ordered ground state. Here we do not consider the spin-orbit coupling (SOC) because it barely affects the results in this system.

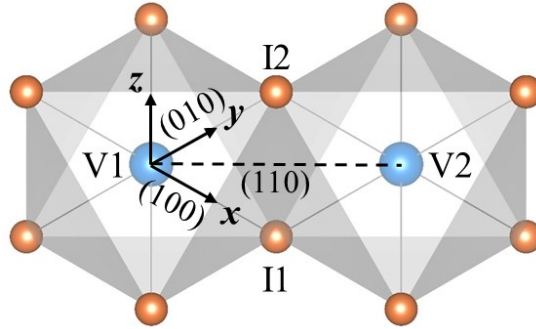

**Fig. S8.** The  $V_2I_2$  cluster model.

The cluster model includes two V and two I ions, which is sufficient to describe the nearest-neighbor inter-atomic exchange interactions. Because the DFT results show that for all the systems, the FM state is the magnetic ground state. Thus, here we only considered the FM state. The Hamiltonian matrix is constructed using the atomic orbital basis  $\{d_{1x^2-y^2}, d_{1z^2}, d_{1xy}, d_{1yz}, d_{1xz}, d_{2x^2-y^2}, d_{2z^2}, d_{2xy}, d_{2yz}, d_{2xz}, p_{1x}, p_{1y}, p_{1z}, p_{2x}, p_{2y}, p_{2z}\}$ . In the local axis (Fig. S8), the direction cosine of the V-V bond is  $[l, m, n] = [\sqrt{2}/2, \sqrt{2}/2, 0]$ , the direction cosine of four V-I bonds are  $[l, m,$



$n] = [1, 0, 0], [0, -1, 0], [0, 1, 0], [-1, 0, 0]$ , respectively. The spin independent part of the Hamiltonian matrix can be written as

$$\hat{H}_{oct} = \begin{bmatrix} H_{M1} & T_{M1,M2} & T_{M1,L1} & T_{M1,L2} \\ T_{M2,M1} & H_{M2} & T_{M2,L1} & T_{M2,L2} \\ T_{L1,M1} & T_{L1,M2} & H_{L1} & T_{L1,L2} \\ T_{L2,M1} & T_{L2,M2} & T_{L2,L1} & H_{L2} \end{bmatrix}$$

where  $H_{M1} = H_{M2} = \text{diag}\{\varepsilon_{eg}, \varepsilon_{eg}, \varepsilon_{t2g}, \varepsilon_{t2g}, \varepsilon_{t2g}\}$  are the block matrices of the intra-orbitals of the V ions.  $H_{L1} = H_{L2} = \text{diag}\{\varepsilon_p, \varepsilon_p, \varepsilon_p\}$  are the block matrices of the intra-orbitals of the I ions.  $T_{M1,M2}$  ( $T_{M2,M1}$ ) is the direct exchange block matrix between V1 and V2, where the nonzero hopping integrals are given by

$$\begin{aligned} I_{d1x2-y2,d2x2-y2} &= V_{dd\pi}, I_{d1z2,d2z2} = \frac{1}{4}(3V_{dd\delta} + V_{dd\sigma}), I_{d1xy,d2xy} = \frac{1}{4}(V_{dd\delta} + 3V_{dd\sigma}), \\ I_{d1xy,d2xy} &= \frac{1}{4}(V_{dd\delta} + 3V_{dd\sigma}), I_{d1yz,d2yz} = I_{d1xz,d2xz} = \frac{1}{2}(V_{dd\pi} + V_{dd\delta}), I_{d1yz,d2xz} \\ &= I_{d1xz,d2yz} \\ &= \frac{1}{2}(V_{dd\pi} - V_{dd\delta}), I_{d1z2,d2xy} = I_{d1xy,d2z2} = \frac{\sqrt{3}}{4}(V_{dd\delta} - V_{dd\sigma}). \end{aligned}$$

$T_{Mi,Li}$  ( $i = 1, 2$ ) is the super-exchange block matrix between I- $p$  orbitals and V- $d$  orbitals. For  $T_{M1,L1}$ , the nonzero hopping integrals

$$I_{d1x2-y2,p1x} = -\frac{\sqrt{3}}{2}V_{pd\sigma}, I_{d1z2,p1x} = \frac{1}{2}V_{pd\sigma}, I_{d1xy,p1y} = I_{d1xz,p1z} = -V_{pd\pi}. \text{ For } T_{M2,L1},$$

$$\text{those are } I_{d2x2-y2,p1y} = -\frac{\sqrt{3}}{2}V_{pd\sigma}, I_{d2z2,p1y} = \frac{1}{2}V_{pd\sigma}, I_{d2xy,p1x} = I_{d2yz,p1z} = -V_{pd\pi}.$$

According to octahedral symmetry, we have  $T_{M1,L2} = -T_{M2,L1}$  and  $T_{M2,L2} = -T_{M1,L1}$ . The hopping among I ions hardly affects the magnetic coupling, hence we neglect  $T_{L1,L2}$  ( $T_{L2,L1}$ ). The  $V_{dd\sigma}$ ,  $V_{dd\pi}$ ,  $V_{dd\delta}$ ,  $V_{pd\sigma}$  and  $V_{pd\pi}$  are Slater Koster hopping integrals depending on the bond length [5].

The  $dxz,yz \leftrightarrow e_g$  effective hopping integral is determined by the  $d-d$  direct-exchange and  $d-p-d$  super-exchange between  $dxz,yz$  and  $dz^2, x^2-y^2$  orbitals. Because  $I_{d1xz,d2z2} = I_{d1xz,d2x2-y2} = 0$ , and the only nonzero  $d-p$  hopping integrals for  $dxz$  orbitals are  $I_{d1xz,p1z}$  whereas the  $I_{d2z2,p1z} = I_{d2x2-y2,p1z} = 0$ ; thus, the  $dxz \leftrightarrow e_g$

effective hopping is zero, so is the effective  $dyz \leftrightarrow e_g$  hopping. For  $dxz, yz \leftrightarrow dxy$  exchange,  $I_{d1xz, d2xy} = 0$ , and the  $I_{d1xy, p1z} = 0$ , thus it is also zero. The  $dxy \leftrightarrow e_g$  effective hopping is nonzero because  $I_{d1xy, d2z2} = \frac{\sqrt{3}}{4}(V_{dd\delta} - V_{dd\sigma})$  and  $I_{d1xy, p1y} = -V_{pd\pi}$ ,  $I_{d2x2-y2, p1y} = -\frac{\sqrt{3}}{2}V_{pd\sigma}$ ,  $I_{d2z2, p1y} = \frac{1}{2}V_{pd\sigma}$ . The  $dxz, yz \leftrightarrow dxz, yz$  effective hopping is nonzero because  $I_{d1yz, d2yz} = I_{d1xz, d2xz} = \frac{1}{2}(V_{dd\pi} + V_{dd\delta})$ ,  $I_{d1yz, d2xz} = I_{d1xz, d2yz} = \frac{1}{2}(V_{dd\pi} - V_{dd\delta})$  and  $I_{d1xz, p1z} = I_{d2yz, p1z} = -V_{pd\pi}$ . The  $dxy \leftrightarrow dxy$  hopping is totally from the direct hopping  $I_{d1xy, d2xy} = \frac{1}{4}(V_{dd\delta} + 3V_{dd\sigma})$ .

Here we define the energy level difference between  $d$  and  $p$  orbitals as  $\Delta_{pd} = \varepsilon_{t2g} - \varepsilon_p$ , the energy level split caused by octahedral crystal field as  $\Delta_c = \varepsilon_{eg} - \varepsilon_{t2g}$ , the energy level split of  $t_{2g}$  levels as  $\Delta_{t2g} = |\varepsilon_{dxy} - \varepsilon_{dxz, yz}|/3$ . Using a coefficient  $t_0$  to evaluate the strength of the super-exchange and direct-exchange interactions, we set  $V_{dd\sigma} = -t_0$ ,  $V_{dd\pi} = 0.25t_0$ ,  $V_{dd\delta} = 0.125t_0$ ,  $V_{pd\sigma} = -4t_0$  and  $V_{pd\pi} = 1.6t_0$ . The electron configuration for the  $V_2I_2$  cluster is  $p^{12}d^4$  (4 spin up  $d$ , 6 spin up  $p$  and 6 spin down  $p$  electrons). Thus, the energy of FM state can be obtained by summarizing the 16 lowest eigenvalues from the numerically diagonalized corresponding Hamiltonian matrix. For the high-symmetric case,  $\Delta_{t2g} = 0$ ; for the type-I case,  $\varepsilon_{dxy} = \varepsilon_{t2g} + 2\Delta_{t2g}$ , and  $\varepsilon_{dxz, yz} = \varepsilon_{t2g} - \Delta_{t2g}$ ; for the type-II case,  $\varepsilon_{dxy} = \varepsilon_{t2g} - 2\Delta_{t2g}$ , and  $\varepsilon_{dxz, yz} = \varepsilon_{t2g} + \Delta_{t2g}$ . For Fig. 1b presented in the main text, the default values for  $U$ ,  $\Delta_c$ ,  $\Delta_{pd}$  and  $\Delta_{t2g}$  and  $t_0$  are taken as 3, 1.8, 0.5 and 0.5 eV, respectively. These values are comparable to those derived from the MLWFs results (see table S1).

When the  $\Delta_{t2g}$  increases from 0.5 to 1.5 eV or  $V_{pd\sigma}$  and  $V_{pd\pi}$  are reduced by 50%, the crossing between the type-I and type-II profiles disappears and the type-I phase becomes always more preferred than the type-II phase. These indicate that, in a  $VI_3$ -like system, when the on-site splitting is stronger and/or the super-

exchange is weaker (compared with the direct-exchange), the type-I phase will be more preferred than the type-II phase. That is to say, only when the JT effect is rather weak and the super-exchange interaction is relatively strong, the twin orbital-order effect may occur in a  $VI_3$ -like system.

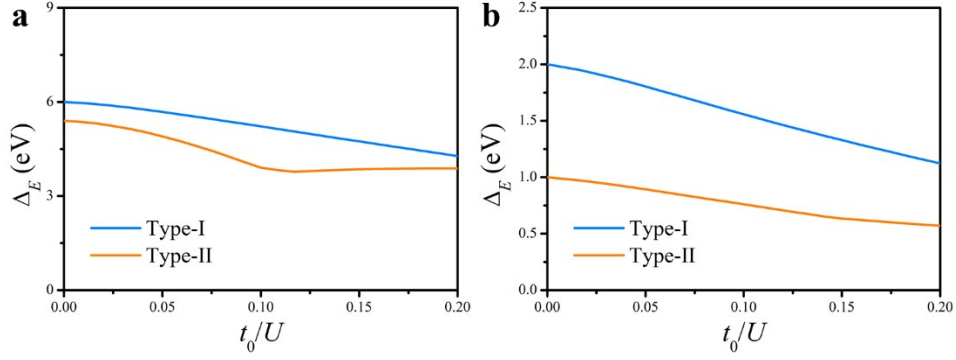

**Fig. S9.** Stabilization energy ( $\Delta E = E_{D3d} - E_{\text{type-I or type-II}}$ ) as a function of  $t_0/U$ . For (a),  $\Delta_{t_{2g}}$  is set to 1.5 eV. For (b),  $V_{pd\sigma} = -2t_0$  and  $V_{pd\pi} = 0.8t_0$ .

### Section III: Other $VI_3$ -like systems

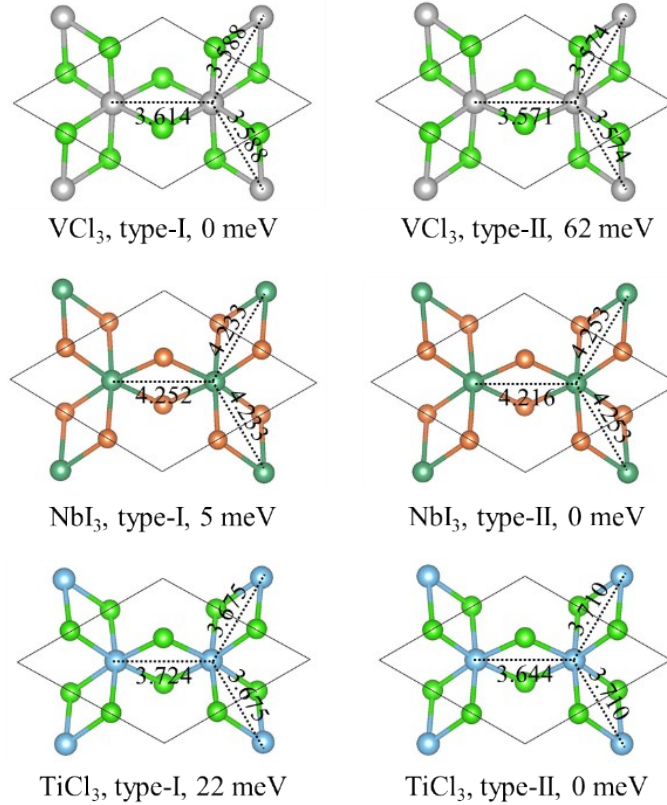

**Fig. S10.** The structural details and relative energies of different structural phases of  $\text{VCl}_3$ ,  $\text{NbI}_3$  and  $\text{TiCl}_3$  monolayers. The inset labels represent the corresponding metal-metal bond length (in angstrom).

DFT+ $U$  method was used in the calculations for these systems.  $U_{\text{eff}} = 3$  eV was adopted for V- $d$  and Ti- $d$  orbitals, and  $U_{\text{eff}} = 2$  eV was adopted for Nb- $d$  orbitals.

### References:

- [1] A. A. Motofi, J. R. Yates, G. Pizzi, Y. S. Lee, I. Souza, D. Vanderbilt, N. Marzari, An updated version of Wannier90: A Tool for Obtaining Maximally Localised Wannier Functions. *Comput. Phys. Commun.* **185**, 2309 (2014).
- [2] C. Huang, Y. Du, H. Wu, H. Xiang, K. Deng, and E. Kan, Prediction of Intrinsic Ferromagnetic Ferroelectricity in a Transition-Metal Halide Monolayer. *Phys. Rev. Lett.* **120**, 147601 (2018).
- [3] C. Huang, J. Feng, F. Wu, D. Ahmed, B. Huang, H. Xiang, K. Deng, and E. Kan, Toward Intrinsic Room-Temperature Ferromagnetism in Two-Dimensional Semiconductors. *J. Am. Chem. Soc.*, **140**, 11519–11525 (2018).
- [4] H. Katsura, N. Nagaosa, A. V. Balatsky, Spin Current and Magnetoelectric Effect in Noncollinear Magnets. *Phys. Rev. Lett.* **95**, 057205 (2005).
- [5] J. C. Slater, G. F. Koster, Simplified LCAO Method for the Periodic Potential Problem. *Phys. Rev.* **94**, 1498 (1954).
